# Supplementary material for: Co-exposure to inhaled tungsten particles and low-dose gamma rays: neurotoxicological outcome in rats
Source: Research Square preprint supplement (doi:10.21203/rs.3.rs-5181911/v1), 2025-04-21
Supplement: Supplementary file 2 [file c5198a90323f36c1498ede5a.xlsx]

## Sheet: Average W concentrations
			Sample
			Lung (ng of W per gram of tissue)			Kidney (ng of W per gram of tissue)			Ethm. Turbin. (ng of W per gram of tissue)			Plasma (ng of W per L of plasma)
	Time point		Control	Tungsten	Co-exposed	Control	Tungsten	Co-exposed	Control	Tungsten	Co-exposed	Control	Tungsten	Co-exposed
	4h	Mean	0.373456	6239.34	4750.12	2.1558	134.662	135.813	1.91308	201.403	274.294
		SEM	0.157867	691.78	464.23	0.543261	11.3407	7.67908	0.490911	64.486	102.398
	24h	Mean	0.0694937	6992.19	5483.9	0.412502	31.1106	29.9344	1.89447	36.9024	55.8628	81.8556	1987.91	1745.62
		SEM	0.0266009	255.754	373.436	0.0455385	1.97307	3.00057	0.460962	11.0349	17.3012	7.60216	462.14	148.884
	28d	Mean	0.106972	2350.28	2210.62	0.426108	1.78477	1.54467	1.37041	11.62	8.1905	76.6085	288.44	302.307
		SEM	0.0207247	258.544	244.97	0.0390842	0.15086	0.224994	0.253432	2.03174	0.542448	6.46919	22.7436	64.7692
			Brain structures (ng of W per gram of tissue)
			OB			FC			ST			HIP			BrSt			CER
	Time point		Control	Tungsten	Co-exposed	Control	Tungsten	Co-exposed	Control	Tungsten	Co-exposed	Control	Tungsten	Co-exposed	Control	Tungsten	Co-exposed	Control	Tungsten	Co-exposed
	4h	Mean	2.45456	4.07901	3.49575	2.011	2.4243	2.52189	9.49226	12.5159	11.0868	6.11831	8.71485	8.51151	5.98262	8.55652	9.09546	3.36692	3.48206	3.38067
		SEM	0.32025	0.143388	0.232904	0.145659	0.285907	0.196753	0.518697	0.750802	0.672021	0.145514	0.327625	0.186015	0.256482	0.473808	0.629986	0.124672	0.365451	0.190038
	24h	Mean	1.40726	2.91505	1.80053	0.5809	0.849863	0.682682	8.65262	2.46696	2.28225	6.51375	1.58636	1.80601	5.90113	1.22298	1.51498	3.50473	1.02033	1.11651
		SEM	0.356049	0.67324	0.153848	0.314555	0.226458	0.122792	0.873112	0.271541	0.32842	0.368434	0.178512	0.144298	0.49457	0.0810024	0.229144	0.0729397	0.0361714	0.156886
	28d	Mean	2.99289	1.60243	4.9131	2.15966	0.250183	0.319369	9.96629	11.1416	9.04439	5.74745	5.7149	6.54339	6.38986	5.79131	5.46357	3.41238	3.42587	3.47836
		SEM	1.18799	0.957228	0.765834	0.34712	0.0207174	0.0651099	1.0016	0.755064	0.644431	0.27565	0.223368	0.201784	0.368865	0.333424	0.39264	0.382538	0.114092	0.173278
	SEM: Standard Error of the Mean
